# Supplementary material for: Targeting Anthrax Toxin Receptor 2 Ameliorates Endometriosis Progression
Source: PubMed Central journal article supplement — Theranostics. 2019 Jan 21;9(3):620–32. doi: 10.7150/thno.30655 (PMC6376465; doi:10.7150/thno.30655), 2019-01-21
Supplement: thnov09p0620s1.pdf [file thnov09p0620s1.pdf]

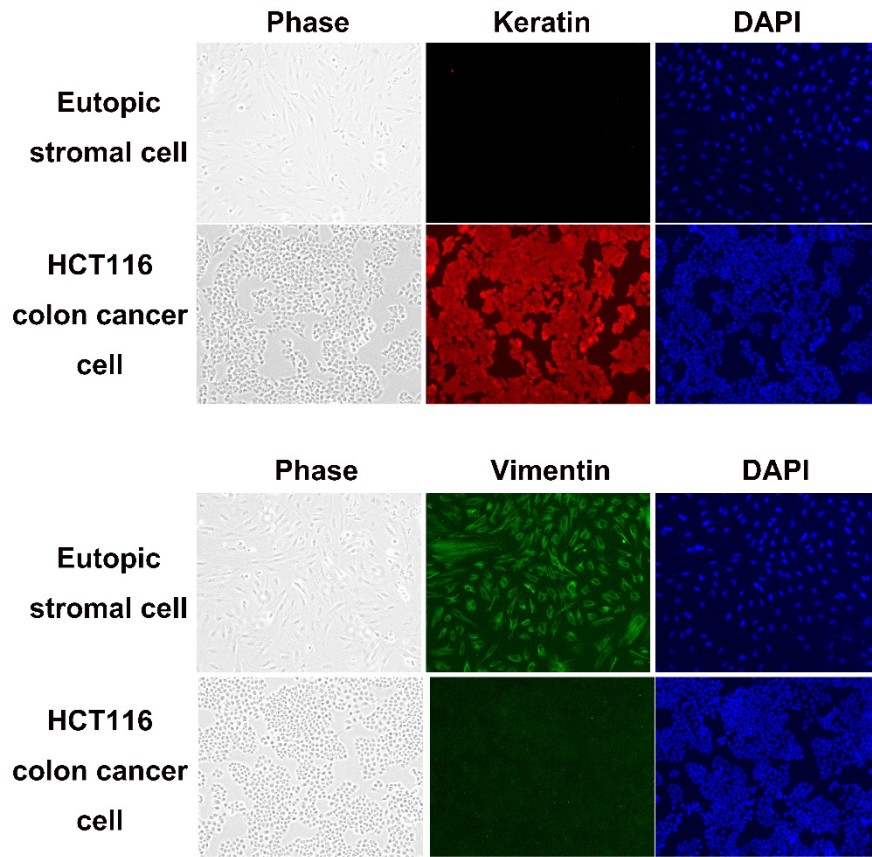

**Supplementary figure 1:** Expressions of keratin, an epithelial cell marker (upper panel) and vimentin, a stromal cell marker (lower panel) in eutopic endometrial stromal cells. HCT116 cell line was used as positive control of epithelial cells.

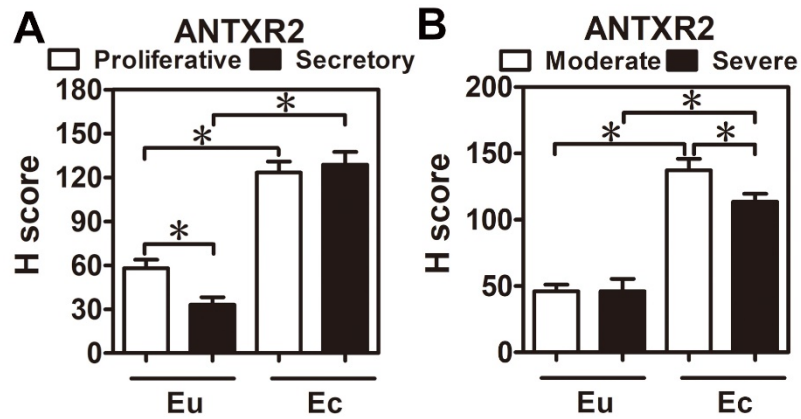

**Supplementary figure 2: Analysis of ANTXR2 levels in eutopic and ectopic specimens according to the menstrual cycle and severity from clinical information of endometriosis patients.** H score of ANTXR2 IHC staining results were further analyzed by menstrual cycle (**A**) and severity (**B**) from clinical information of endometriosis patients. Proliferative phase (Eu: n=22; Ec: n=22); Secretory phase (Eu: n=20; Ec: n=20). Asterisk indicates  $p < 0.05$ .

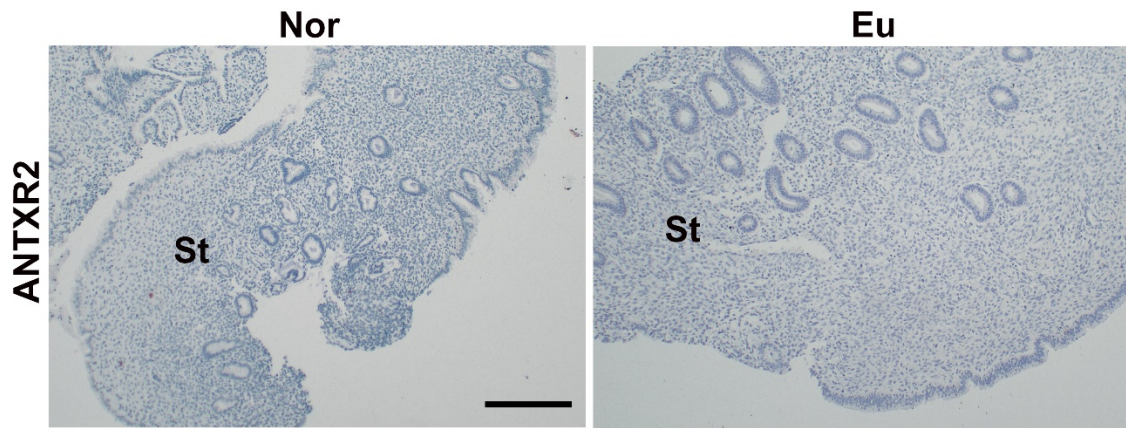

**Supplementary figure 3: Representative images of ANTXR2 IHC staining in normal endometria (Nor, n=23) and eutopic endometria (Eu, n=42) derived from patients with endometriosis.**

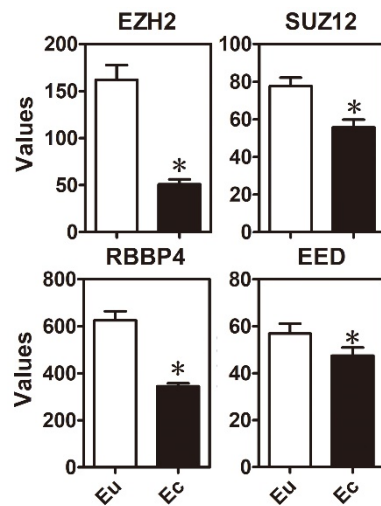

**Supplementary figure 4: Expressions of PRC complexes in the public dataset of endometriosis.** Expressions of PRC2 complexes such as EZH2, SUZ12, RBBP4, and EED were analyzed from a public dataset of endometriotic specimens (GSE7305). Results were represented as mean±SEM. Asterisk indicates p<0.05.

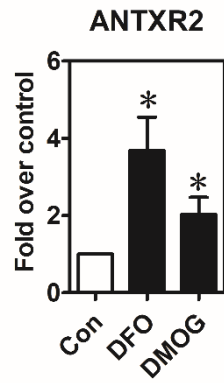

**Supplementary figure 5: ANTXR2 expression was induced by chemical hypoxia in eutopic stromal cells.** ANTXR2 expression was analyzed by quantitative RT-PCR in eutopic stromal cells treated with 1 mM DFO or DMOG for 24 hours (n=4).

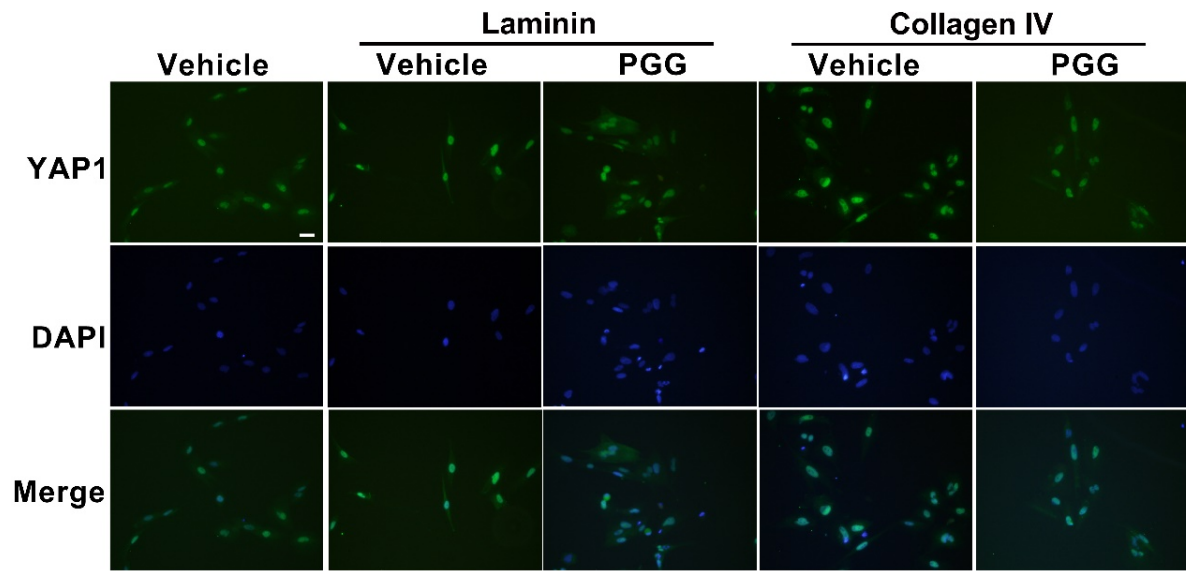

**Supplementary figure 6: Laminin- and Collagen IV-induced nuclear translocation of YAP1 in eutopic stromal cells was mediated by ANTXR2.** Eutopic stromal cells were plated in the dish coating with laminin (0.5 mg/ml) or collagen IV (0.5 mg/ml) and treated with or without ANTXR2 inhibitor (PGG, 5  $\mu$ M) for 24 hrs. Then, cells were fixed and stained by YAP1 and DAPI. Scale bar: 20  $\mu$ m

Supplementary table 1: Information for clinical specimens of endometriosis

| Eutopic | Ectopic | Location        | diagnosis                   | age | phase | BMI  |
|---------|---------|-----------------|-----------------------------|-----|-------|------|
| 001Eu   | 001Ec   | ovarian         | Severe endometriosis (IV)   | 36  | P     | 21.9 |
| 002Eu   | 002Ec   | ovarian         | Severe endometriosis (IV)   | 35  | P     | 18.2 |
| 003Eu   | 003Ec   | ovarian         | Moderate endometriosis(III) | 35  | P     | 20.5 |
| 004Eu   | 004Ec   | ovarian         | Moderate endometriosis(III) | 24  | S     | 20.4 |
| 005Eu   | 005Ec   | ovarian         | Severe endometriosis (IV)   | 48  | S     | 25.7 |
| 006Eu   | 006Ec   | ovarian         | Moderate endometriosis(III) | 37  | P     | 22.6 |
| 007Eu   | 007Ec   | ovarian         | Severe endometriosis (IV)   | 33  | S     | 29.3 |
| 008Eu   | 008Ec   | ovarian         | Severe endometriosis (IV)   | 31  | P     | 15.6 |
| 009Eu   | 009Ec   | ovarian         | Severe endometriosis (IV)   | 35  | S     | 24.7 |
| 010Eu   | 010Ec   | ovarian         | Moderate endometriosis(III) | 26  | P     | 27   |
| 011Eu   | 011Ec   | ovarian         | Severe endometriosis (IV)   | 26  | S     | 20.7 |
| 012Eu   | 012Ec   | ovarian         | Severe endometriosis (IV)   | 39  | P     | 18.9 |
| 013Eu   | 013Ec   | ovarian         | Severe endometriosis (IV)   | 40  | S     | 21   |
| 014Eu   | 014Ec   | ovarian         | Severe endometriosis (IV)   | 33  | S     | 20.5 |
| 015Eu   | 015Ec   | ovarian         | Moderate endometriosis(III) | 29  | P     | 21.7 |
| 016Eu   | 016Ec   | ovarian         | Moderate endometriosis(III) | 44  | S     | 21.1 |
| 017Eu   | 017Ec   | ovarian         | Moderate endometriosis(III) | 33  | S     | 22.4 |
| 018Eu   | 018Ec   | ovarian         | Severe endometriosis (IV)   | 34  | P     | 21.8 |
| 019Eu   | 019Ec   | ovarian         | Severe endometriosis (IV)   | 34  | S     | 19.1 |
| 020Eu   | 020Ec   | ovarian         | Severe endometriosis (IV)   | 43  | S     | 20.8 |
| 021Eu   | 021Ec   | ovarian         | Severe endometriosis (IV)   | 33  | P     | 22.2 |
| 022Eu   | 022Ec   | ovarian         | Severe endometriosis (IV)   | 41  | S     | 22   |
| 023Eu   | 023Ec   | ovarian         | Severe endometriosis (IV)   | 33  | P     | 22.8 |
| 024Eu   | 024Ec   | ovarian         | Severe endometriosis (IV)   | 41  | P     | 21.1 |
| 025Eu   | 025Ec   | ovarian         | Moderate endometriosis(III) | 25  | S     | 22.9 |
| 026Eu   | 026Ec   | ovarian         | Moderate endometriosis(III) | 49  | P     | 22.9 |
|         | 027Ec   | ovarian         | Moderate endometriosis(III) | 27  | S     | 23   |
|         | 028Ec   | ovarian         | Moderate endometriosis(III) | 25  | P     | 16   |
|         | 029Ec   | ovarian         | Moderate endometriosis(III) | 45  | S     | 20.9 |
|         | 030Ec   | ovarian         | Moderate endometriosis(III) | 39  | S     | 20.6 |
|         | 031Ec   | Peritoneal wall | Moderate endometriosis(III) | 31  | S     | 29.6 |
|         | 032Ec   | ovarian         | Moderate endometriosis(III) | 37  | P     | 14.8 |
|         | 033Ec   | ovarian         | Severe endometriosis (IV)   | 27  | P     | 18.9 |
|         | 034Ec   | ovarian         | Severe endometriosis (IV)   | 39  | S     | 19.7 |

|              |              |                        |                                   |           |          |             |
|--------------|--------------|------------------------|-----------------------------------|-----------|----------|-------------|
|              | <b>035Ec</b> | <b>ovarian</b>         | <b>Moderate endometriosis(Ⅲ)</b>  | <b>29</b> | <b>S</b> | <b>19.8</b> |
|              | <b>036Ec</b> | <b>ovarian</b>         | <b>Moderate endometriosis(Ⅲ)</b>  | <b>31</b> | <b>P</b> | <b>23.5</b> |
|              | <b>037Ec</b> | <b>Peritoneal wall</b> | <b>Moderate endometriosis(Ⅲ)</b>  | <b>29</b> | <b>P</b> | <b>20.7</b> |
|              | <b>038Ec</b> | <b>ovarian</b>         | <b>Mild endometriosis (Ⅱ)</b>     | <b>39</b> | <b>S</b> | <b>20.1</b> |
|              | <b>039Ec</b> | <b>ovarian</b>         | <b>Moderate endometriosis(Ⅲ)</b>  | <b>32</b> | <b>P</b> | <b>19.4</b> |
|              | <b>040Ec</b> | <b>ovarian</b>         | <b>Moderate endometriosis(Ⅲ)</b>  | <b>29</b> | <b>P</b> | <b>18.6</b> |
|              | <b>041Ec</b> | <b>ovarian</b>         | <b>Severe endometriosis (Ⅳ)</b>   | <b>24</b> | <b>P</b> | <b>17.4</b> |
|              | <b>042Ec</b> | <b>ovarian</b>         | <b>Moderate endometriosis(Ⅲ)</b>  | <b>28</b> | <b>P</b> | <b>28.5</b> |
| <b>043Eu</b> |              | <b>ovarian</b>         | <b>Moderate endometriosis(Ⅲ)</b>  | <b>33</b> | <b>S</b> | <b>27.2</b> |
| <b>044Eu</b> |              | <b>ovarian</b>         | <b>Moderate endometriosis(Ⅲ)</b>  | <b>38</b> | <b>P</b> | <b>24.1</b> |
| <b>045Eu</b> |              | <b>ovarian</b>         | <b>Moderate endometriosis(Ⅲ)</b>  | <b>39</b> | <b>S</b> | <b>19.3</b> |
| <b>046Eu</b> |              | <b>ovarian</b>         | <b>Moderate endometriosis(Ⅲ)</b>  | <b>27</b> | <b>S</b> | <b>21.6</b> |
| <b>047Eu</b> |              | <b>ovarian</b>         | <b>Severe endometriosis (Ⅳ)</b>   | <b>41</b> | <b>P</b> | <b>20.3</b> |
| <b>048Eu</b> |              | <b>ovarian</b>         | <b>Moderate endometriosis (Ⅲ)</b> | <b>31</b> | <b>P</b> | <b>18.8</b> |
| <b>049Eu</b> |              | <b>ovarian</b>         | <b>Moderate endometriosis (Ⅲ)</b> | <b>30</b> | <b>P</b> | <b>20.4</b> |
| <b>050Eu</b> |              | <b>Peritoneal wall</b> | <b>Moderate endometriosis (Ⅲ)</b> | <b>23</b> | <b>S</b> | <b>19.6</b> |
| <b>051Eu</b> |              | <b>ovarian</b>         | <b>Mild endometriosis (Ⅱ)</b>     | <b>35</b> | <b>P</b> | <b>20.1</b> |
| <b>052Eu</b> |              | <b>ovarian</b>         | <b>Moderate endometriosis(Ⅲ)</b>  | <b>38</b> | <b>S</b> | <b>19.9</b> |
| <b>053Eu</b> |              | <b>Peritoneal wall</b> | <b>Moderate endometriosis(Ⅲ)</b>  | <b>42</b> | <b>P</b> | <b>20.7</b> |
| <b>054Eu</b> |              | <b>ovarian</b>         | <b>Moderate endometriosis(Ⅲ)</b>  | <b>28</b> | <b>S</b> | <b>17.4</b> |
| <b>055Eu</b> |              | <b>ovarian</b>         | <b>Moderate endometriosis(Ⅲ)</b>  | <b>22</b> | <b>P</b> | <b>18.8</b> |
| <b>056Eu</b> |              | <b>ovarian</b>         | <b>Moderate endometriosis(Ⅲ)</b>  | <b>37</b> | <b>P</b> | <b>21.1</b> |
| <b>057Eu</b> |              | <b>ovarian</b>         | <b>Moderate endometriosis(Ⅲ)</b>  | <b>26</b> | <b>P</b> | <b>19</b>   |
| <b>058Eu</b> |              | <b>ovarian</b>         | <b>Moderate endometriosis(Ⅲ)</b>  | <b>39</b> | <b>S</b> | <b>26.4</b> |
| <b>059Eu</b> |              | <b>ovarian</b>         | <b>Moderate endometriosis(Ⅲ)</b>  | <b>43</b> | <b>P</b> | <b>18</b>   |



Supplementary table 2: Primer sequences

| Gene Symbol                               | Forward                | Reverse                  |
|-------------------------------------------|------------------------|--------------------------|
| Realtime primer_human ANTXR2              | acacaccagcctcctcagac   | atactgccgcctcaacaaag     |
| Realtime primer_human ANTXR1              | gaaagggccagtgagcag     | agttctccatcagtcacaaagca  |
| Realtime primer_human EZH2                | aaagaactcaccgaacagca   | agcgtatgaaaggagtgtgtaagc |
| Realtime primer_human PDK1                | ttctcaggacacccatccgttc | gagacctgcaaccatgttctt    |
| Realtime primer_human COL5A2              | ctggaatgaagggagaagca   | ggaagacctggagagccaac     |
| Realtime primer_human CTGF                | ggagtggtgtgtgacgag     | ccaggcagttggctctaact     |
| Realtime primer_IL-1 $\beta$              | tcgccagtgaaatgatgg     | cccttgctgtagtgggtggtc    |
| Realtime primer_VEGFC                     | gagcagttacggctctgtgtcc | tatgttgccagcctcctttc     |
| Realtime primer_CTNNB1                    | aggctctgtgcgtactgtc    | atctctgcttcttggtgtcg     |
| Realtime primer_CD44                      | gcaaacacaacctctggctct  | ttcttctgcccacaccttct     |
| Realtime primer_18s rRNA                  | gtgtgcctaccctacg       | tgacccgcacttactg         |
| EZH2-ChIP_primer_ANTXR2                   | ggagggagagagggaggtc    | cactgggattcgtaagagttc    |
| YAP1-ChIP_primer_CD44                     | tcttaacaagtcgcagagagg  | gattccctccattcattca      |
| YAP1-ChIP_primer_COL5A2                   | aatacttccatctcccacaaa  | caacggacaaacacattcct     |
| ANTXR2_siRNA (Ambion, 4392420-s42200)     | ccaguaaguguacagcuuatt  | uaagcuguacacuuacuggtt    |
| EZH2_siRNA_smartpool (M-004218-03-0020)-1 | caaagaaucaucaucaua     |                          |
| EZH2_siRNA_smartpool (M-004218-03-0020)-2 | gaggacggcuucccaauaa    |                          |
| EZH2_siRNA_smartpool (M-004218-03-0020)-3 | gcugaagccucaauguuua    |                          |
| EZH2_siRNA_smartpool (M-004218-03-0020)-4 | gaauggaaacagcgaagga    |                          |

**Supplementary table 3: Antibody list**

| <b>Antibody name</b>            | <b>Catalog</b>    | <b>company</b>        | <b>dilution factor<br/>(Western blot)</b> | <b>dilution factor<br/>(IHC)</b> |
|---------------------------------|-------------------|-----------------------|-------------------------------------------|----------------------------------|
| <b>ANTXR2</b>                   | <b>ab129004</b>   | <b>Abcam</b>          |                                           | <b>200</b>                       |
| <b>ANTXR2</b>                   | <b>16723-1-AP</b> | <b>Proteintech</b>    | <b>2000</b>                               |                                  |
| <b>EZH2</b>                     | <b>5246</b>       | <b>Cell Signaling</b> | <b>2000</b>                               | <b>200</b>                       |
| <b>YAP1</b>                     | <b>14074</b>      | <b>Cell Signaling</b> | <b>2000</b>                               | <b>100 (ICC)</b>                 |
| <b>P-YAP1(s127)</b>             | <b>4911</b>       | <b>Cell Signaling</b> | <b>2000</b>                               |                                  |
| <b>HIF-1<math>\alpha</math></b> | <b>36169</b>      | <b>Cell Signaling</b> | <b>2000</b>                               |                                  |
| <b>CD31</b>                     | <b>ab28364</b>    | <b>Abcam</b>          |                                           | <b>100</b>                       |
| <b>Ki67</b>                     | <b>GTX16667</b>   | <b>Genetex</b>        |                                           | <b>200</b>                       |
| <b><math>\beta</math>-actin</b> | <b>A5441</b>      | <b>Sigma</b>          | <b>10000</b>                              |                                  |

**Supplementary table 4: Public dataset list**

| <b>GEO number</b> | <b>Dataset information</b>                                                                       | <b>Reference</b>                                            |
|-------------------|--------------------------------------------------------------------------------------------------|-------------------------------------------------------------|
| <b>GSE7305</b>    | <b>gene expression profile from normal and diseased endometrial human tissues</b>                | <b>Proc Natl Acad Sci U S A 2007 Jul 24;104(30):12451-6</b> |
| <b>GSE5108</b>    | <b>gene expression profile from human ectopic and eutopic endometrial tissues</b>                | <b>Fertil Steril 2007 Dec;88(6):1505-33</b>                 |
| <b>GSE51981</b>   | <b>gene expression profile from a large cohort of normal endometrial and endometrial tissues</b> | <b>Endocrinology 2014 Dec;155(12):4986-99</b>               |
| <b>GSE55186</b>   | <b>YAP1-ChIP-seq in mouse embryonal rhabdomyosarcoma (RMS) cells</b>                             | <b>Cancer Cell 2014 Aug 11;26(2):273-87.</b>                |

**Supplementary table 5: Potential EZH2 downstream target list**

| gene symbol | strand | expression (Ec/Eu)_GSE7305 |
|-------------|--------|----------------------------|
| C10orf10    | (-)    | 9.86414                    |
| NBL1        | (+)    | 4.93985                    |
| GALNTL2     | (+)    | 3.960533                   |
| PAR3B       | (+)    | 3.753463                   |
| CARD16      | (-)    | 3.507215                   |
| FXYD1       | (+)    | 3.468647                   |
| BCL6        | (-)    | 3.38538                    |
| LPP         | (+)    | 2.854344                   |
| TPM1        | (+)    | 2.806289                   |
| SRGAP1      | (+)    | 2.772242                   |
| TSPAN5      | (-)    | 2.77215                    |
| UCHL1       | (+)    | 2.721031                   |
| BICC1       | (+)    | 2.719775                   |
| TM4SF1      | (-)    | 2.615921                   |
| ANTXR2      | (-)    | 2.60855                    |
| CLIP1       | (-)    | 2.606927                   |
| IGFBP3      | (-)    | 2.587584                   |
| MCAM        | (-)    | 2.51794                    |
| ENG         | (-)    | 2.508343                   |
| C1QTNF7     | (+)    | 2.465887                   |
| COL12A1     | (-)    | 2.462066                   |
| TENC1       | (+)    | 2.414106                   |
| ANKRD57     | (+)    | 2.414032                   |
| UACA        | (-)    | 2.389334                   |
| PER1        | (-)    | 2.377421                   |
| SNX18       | (+)    | 2.363895                   |
| FGFR1       | (-)    | 2.35537                    |
| EPHX1       | (+)    | 2.325712                   |
| POU6F1      | (-)    | 2.287591                   |
| MVP         | (+)    | 2.245461                   |
| LAMB2       | (-)    | 2.235176                   |
| NET1        | (+)    | 2.112328                   |
| LIMS2       | (-)    | 2.102517                   |
| NDRG2       | (-)    | 2.077656                   |
| HCLS1       | (-)    | 2.046525                   |

|        |     |          |
|--------|-----|----------|
| PLXNA4 | (-) | 2.023304 |
| LRRC15 | (-) | 2.009724 |
| GLG1   | (-) | 2.004108 |

**Supplementary table 6: Potential function of ANTXR2**

| <b>Enrichment by Process Networks</b>                        |              |                  |                  | <b>p0.005 pos corr-uniq</b> |
|--------------------------------------------------------------|--------------|------------------|------------------|-----------------------------|
| <b>Networks</b>                                              | <b>Total</b> | <b>pValue</b>    | <b>p-value</b>   | <b>FDR</b>                  |
| <b>Cytoskeleton_Regulation of cytoskeleton rearrangement</b> | <b>183</b>   | <b>4.653E-06</b> | <b>4.653E-06</b> | <b>6.165E-05</b>            |
| <b>Development_Regulation of angiogenesis</b>                | <b>222</b>   | <b>3.649E-05</b> | <b>3.649E-05</b> | <b>3.054E-04</b>            |
| <b>Cell adhesion_Integrin-mediated cell-matrix adhesion</b>  | <b>214</b>   | <b>4.530E-05</b> | <b>4.530E-05</b> | <b>3.601E-04</b>            |
| <b>Proliferation_Positive regulation cell proliferation</b>  | <b>221</b>   | <b>1.337E-03</b> | <b>1.337E-03</b> | <b>5.747E-03</b>            |
| <b>Cell adhesion_Cell junctions</b>                          | <b>162</b>   | <b>1.432E-03</b> | <b>1.432E-03</b> | <b>5.838E-03</b>            |
| <b>Cell adhesion_Attractive and repulsive receptors</b>      | <b>175</b>   | <b>1.588E-03</b> | <b>1.588E-03</b> | <b>6.312E-03</b>            |
| <b>Cell adhesion_Integrin priming</b>                        | <b>110</b>   | <b>1.405E-02</b> | <b>1.405E-02</b> | <b>3.661E-02</b>            |
| <b>Inflammation_IL-6 signaling</b>                           | <b>119</b>   | <b>2.137E-02</b> | <b>2.137E-02</b> | <b>4.996E-02</b>            |
| <b>Cell adhesion_Cadherins</b>                               | <b>180</b>   | <b>8.159E-02</b> | <b>8.159E-02</b> | <b>1.593E-01</b>            |

**Supplementary table 7: Potential intracellular signaling pathways of ANTXR2**

| Maps                                                                                                  | Total | pValue    | Min FDR   | p-value   | FDR       | In Data |
|-------------------------------------------------------------------------------------------------------|-------|-----------|-----------|-----------|-----------|---------|
| Apoptosis and survival_NGF/ TrkA PI3K-mediated signaling                                              | 77    | 7.926E-11 | 1.417E-08 | 7.926E-11 | 1.417E-08 | 38      |
| G-protein signaling_G-Protein alpha-12 signaling pathway                                              | 38    | 3.179E-10 | 4.737E-08 | 3.179E-10 | 4.737E-08 | 24      |
| Signal transduction_mTORC1 downstream signaling                                                       | 61    | 1.750E-09 | 1.738E-07 | 1.750E-09 | 1.738E-07 | 31      |
| Development_Positive regulation of STK3/4 (Hippo) pathway and negative regulation of YAP/TAZ function | 70    | 6.141E-09 | 4.575E-07 | 6.141E-09 | 4.575E-07 | 33      |
| Development_TGF-beta receptor signaling                                                               | 50    | 1.937E-08 | 1.049E-06 | 1.937E-08 | 1.049E-06 | 26      |
| Cytoskeleton remodeling_FAK signaling                                                                 | 57    | 2.809E-08 | 1.395E-06 | 2.809E-08 | 1.395E-06 | 28      |
| Chemotaxis_CXCR4 signaling pathway                                                                    | 34    | 5.548E-08 | 2.157E-06 | 5.548E-08 | 2.157E-06 | 20      |
| Immune response_IL-4 signaling pathway                                                                | 94    | 8.104E-08 | 3.019E-06 | 8.104E-08 | 3.019E-06 | 38      |
| Signal transduction_NF-kB activation pathways                                                         | 51    | 7.541E-07 | 1.532E-05 | 7.541E-07 | 1.532E-05 | 24      |
| Signal transduction_Activation of PKC via G-Protein coupled receptor                                  | 52    | 1.174E-06 | 2.057E-05 | 1.174E-06 | 2.057E-05 | 24      |
| Signal transduction_Soluble CXCL16 signaling                                                          | 49    | 1.355E-06 | 2.244E-05 | 1.355E-06 | 2.244E-05 | 23      |

|                                                            |           |                  |                  |                  |                  |           |
|------------------------------------------------------------|-----------|------------------|------------------|------------------|------------------|-----------|
| <b>Signal<br/>transduction_JNK<br/>pathway</b>             | <b>47</b> | <b>1.026E-05</b> | <b>1.030E-04</b> | <b>1.026E-05</b> | <b>1.030E-04</b> | <b>21</b> |
| <b>G-protein<br/>signaling_RhoA<br/>regulation pathway</b> | <b>34</b> | <b>1.136E-05</b> | <b>1.092E-04</b> | <b>1.136E-05</b> | <b>1.092E-04</b> | <b>17</b> |
| <b>Signal<br/>transduction_PKA<br/>signaling</b>           | <b>51</b> | <b>1.269E-05</b> | <b>1.147E-04</b> | <b>1.269E-05</b> | <b>1.147E-04</b> | <b>22</b> |
